# Supplementary material
Source: PubMed Central journal article supplement (PMC3210500)
Supplement: supp_138.23.5247_DEV069203TableS1.pdf [file supp_138.23.5247_DEV069203TableS1.pdf]

**Table S1. Primers for quantitative real-time PCR**

| Gene       | Primer sequence (5' to 3')                    |
|------------|-----------------------------------------------|
| <i>Id4</i> | TGAACAAGCAGGGTGACAG<br>CGGTGGCTTGTTCCTTAATTTC |
| <i>p21</i> | CAGATCCACAGCGATATCCAG<br>AGAGACAACGGCACACTTTG |
| <i>p16</i> | GTGCGATATTTGCGTTCCG<br>TCTGCTCTGGGATTGGC      |
| cyclin D1  | CTGGCCATGAACTACCTGGA<br>ATCCGCCTCTGGCATTITGG  |
| keratin 5  | TCAAGAAGCAGTGTGCCAAC<br>TCCAGCAGCTTCTGTTAGGT  |
