# Supplementary material
Source: PubMed Central journal article supplement (PMC3210500)
Supplement: supp_138.23.5247_DEV069203TableS2.pdf [file supp_138.23.5247_DEV069203TableS2.pdf]

**Table S2. siRNA oligos**

| Gene                          | siRNA oligo sequence (5' to 3')                                                                 | Vendor    | Catalog No. |
|-------------------------------|-------------------------------------------------------------------------------------------------|-----------|-------------|
| <i>Id4</i>                    | GCAUUCACCGUACGUUUUUU<br>GUAGAAGAGCAAUCGUGAAUU<br>GUACUGGUCUUGCAUGAUUUU<br>GAAACGUCGUCUCGUCUUGUU | Dharmacon | L-043687    |
| <i>Id4</i>                    | UCACCGCGCUAACACUGAtt<br>UCAGUGUUGAGCGCGGUGAg                                                    | Ambion    | 568017      |
| <i>p38<math>\alpha</math></i> | GGGAGGUGCCCGAACGAUA<br>GCAAGAAACUACAUCAGU<br>ACAUUCGGCUGACAUAUUU<br>GAAAUGGAGUCCUGAGCAC         | Dharmacon | L-040125    |
| <i>p38<math>\alpha</math></i> | ACCUAGCUGUGAACGAAGAtt<br>UCUUCGUUCACAGCUAGGUtg                                                  | Ambion    | 577113      |
| <i>p38<math>\beta</math></i>  | AUGAGGAGAUGACCCGAUA<br>CGCCAGAGGUCAUGCUGAAA<br>GCACGAGAACGUCAUAGGA<br>CGAUGAGCAUGUCAAUUC        | Dharmacon | L-050928    |
| <i>p38<math>\beta</math></i>  | CGCCCUUCCAAUCGCUGAtt<br>UCAGCGAUUGGAAAGGGCGag                                                   | Ambion    | 572152      |
