# Supplementary material
Source: PubMed Central journal article supplement (PMC3210500)

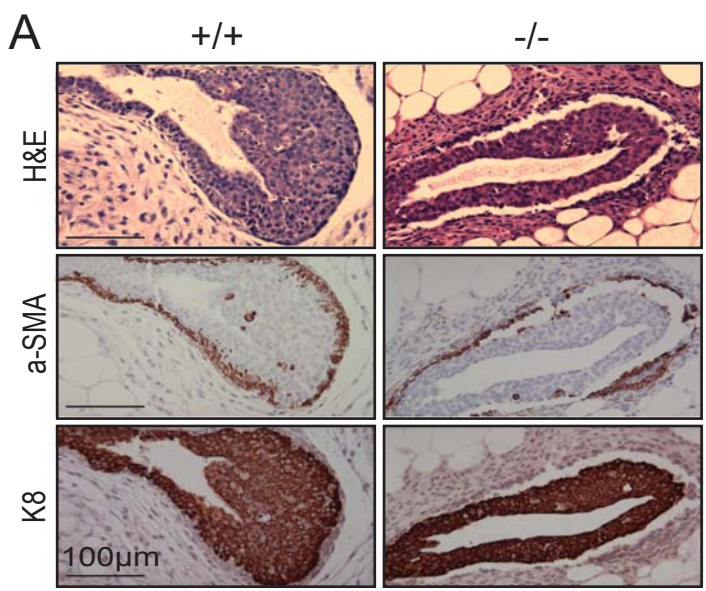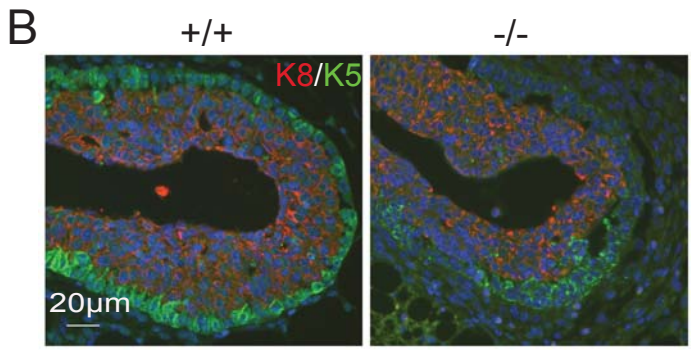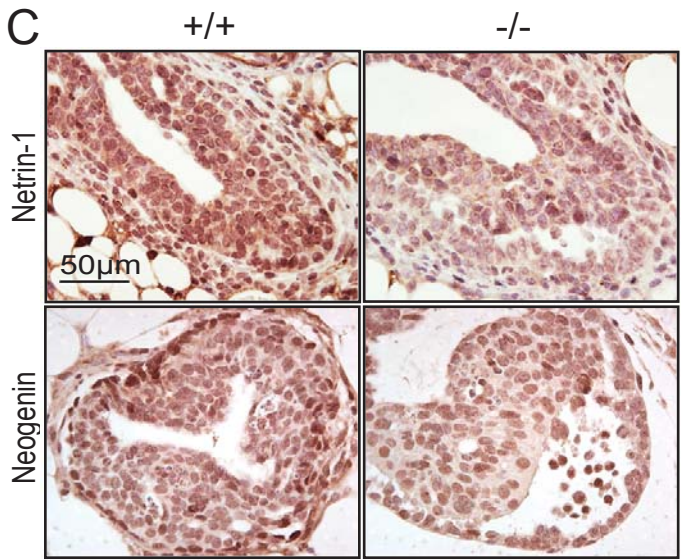

Supplement: supp_138.23.5247_DEV069203FigS1.pdf [file supp_138.23.5247_DEV069203FigS1.pdf]

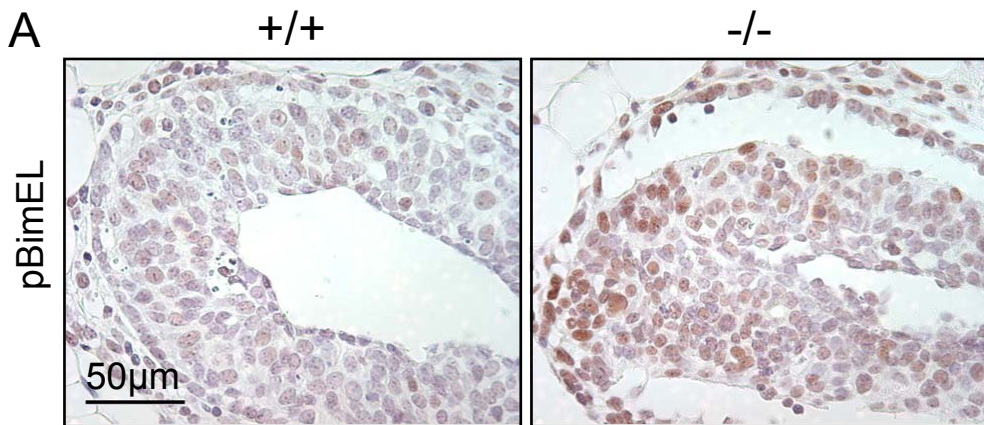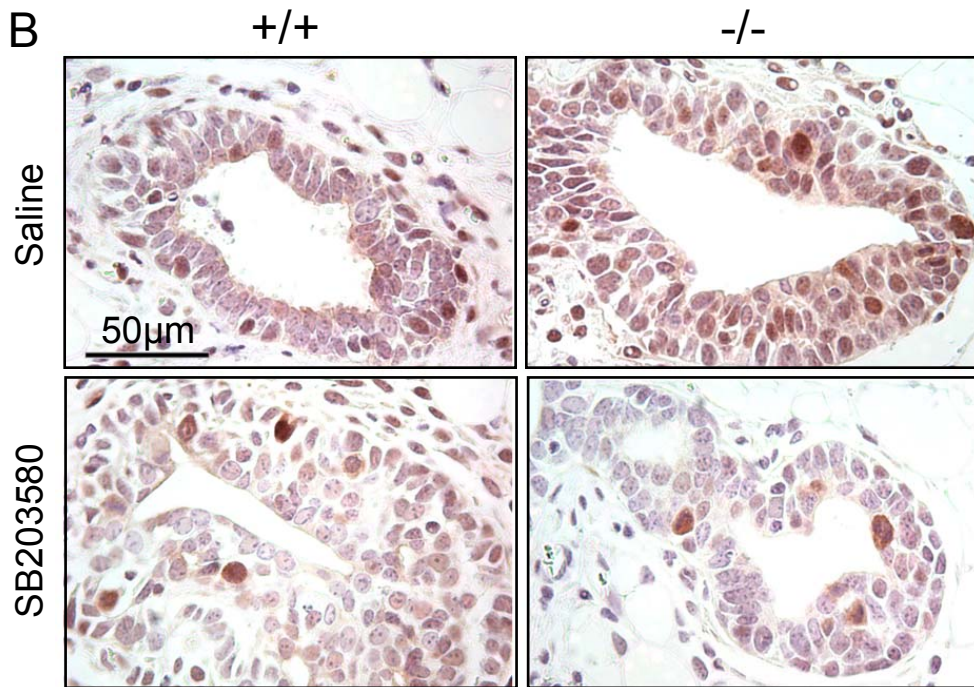

Supplement: supp_138.23.5247_DEV069203FigS10.pdf [file supp_138.23.5247_DEV069203FigS10.pdf]

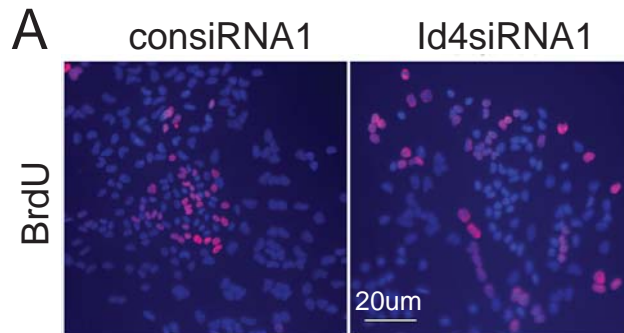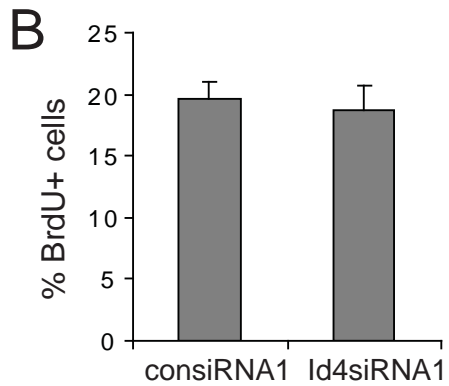

Supplement: supp_138.23.5247_DEV069203FigS11.pdf [file supp_138.23.5247_DEV069203FigS11.pdf]

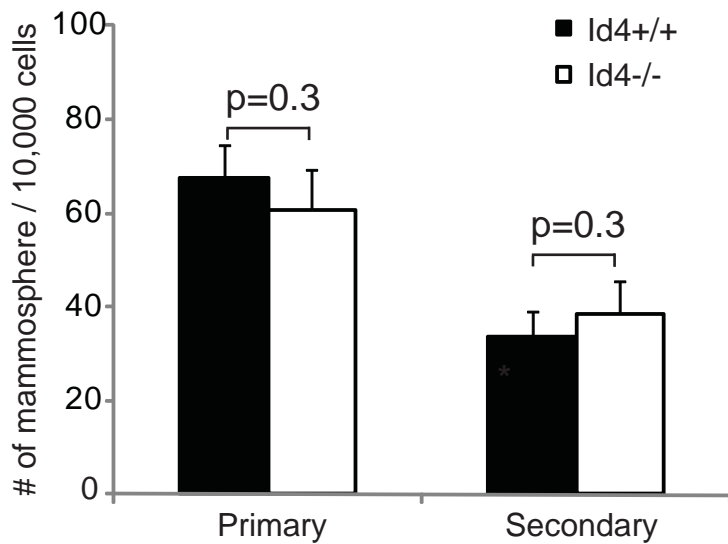

Supplement: supp_138.23.5247_DEV069203FigS12.pdf [file supp_138.23.5247_DEV069203FigS12.pdf]

## 10-week-old

A

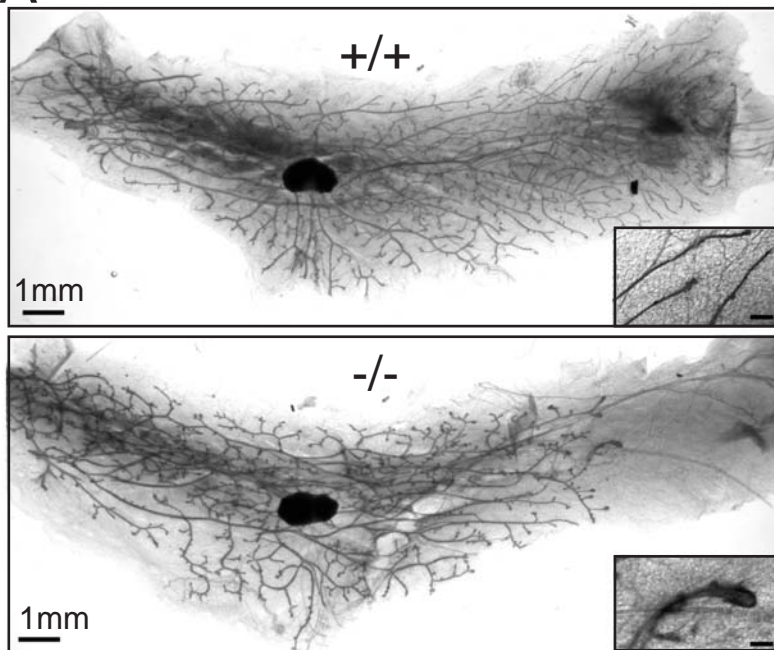

B

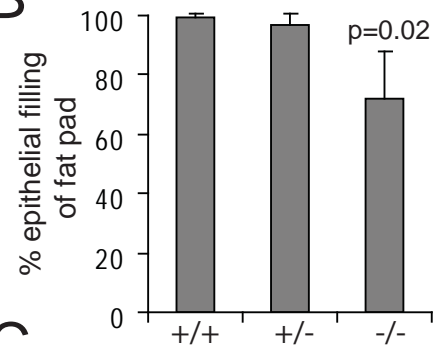

C

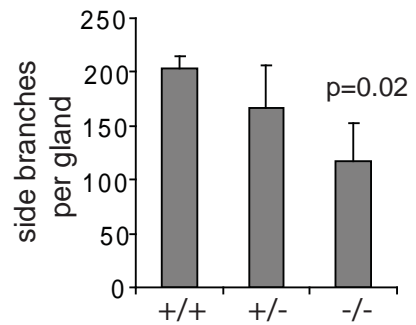

## 25-week-old

D

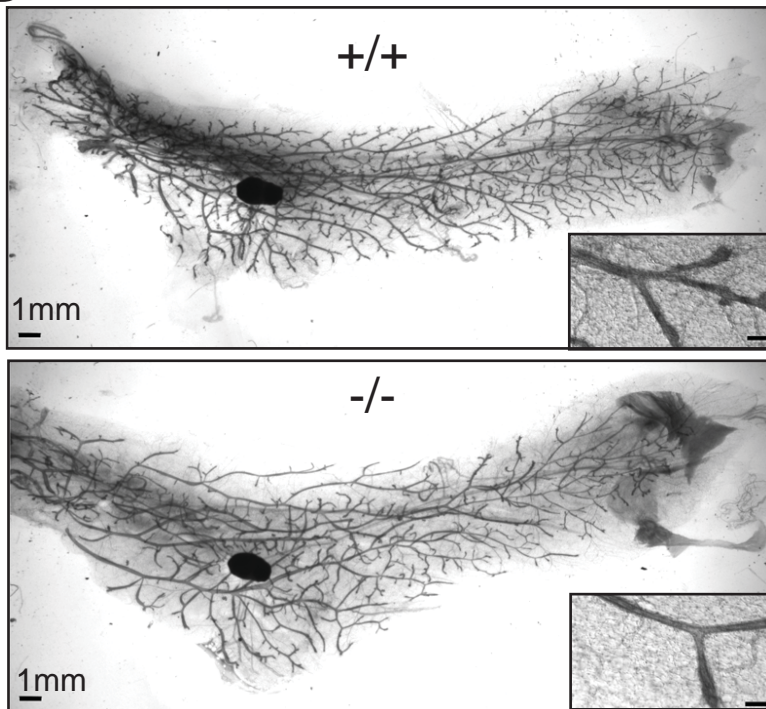

E

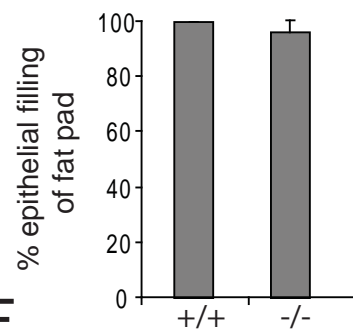

F

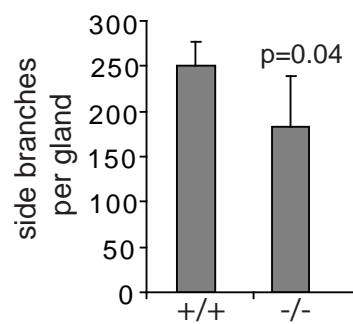

Supplement: supp_138.23.5247_DEV069203FigS2.pdf [file supp_138.23.5247_DEV069203FigS2.pdf]

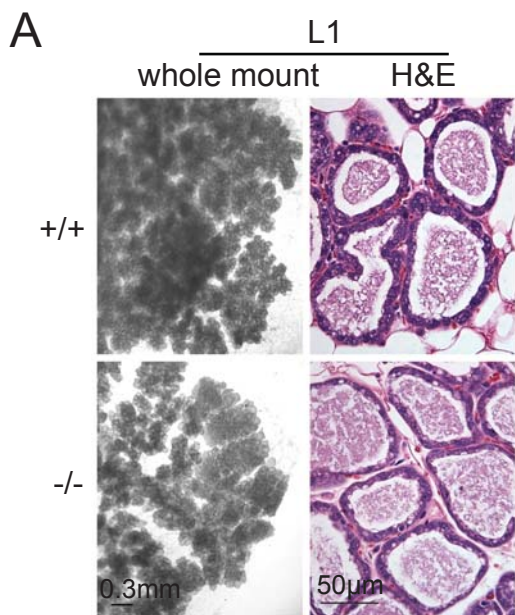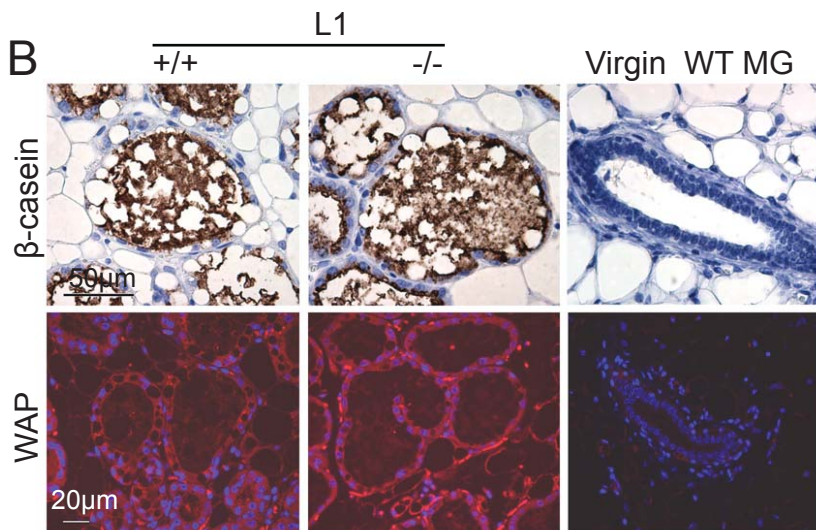

Supplement: supp_138.23.5247_DEV069203FigS3.pdf [file supp_138.23.5247_DEV069203FigS3.pdf]

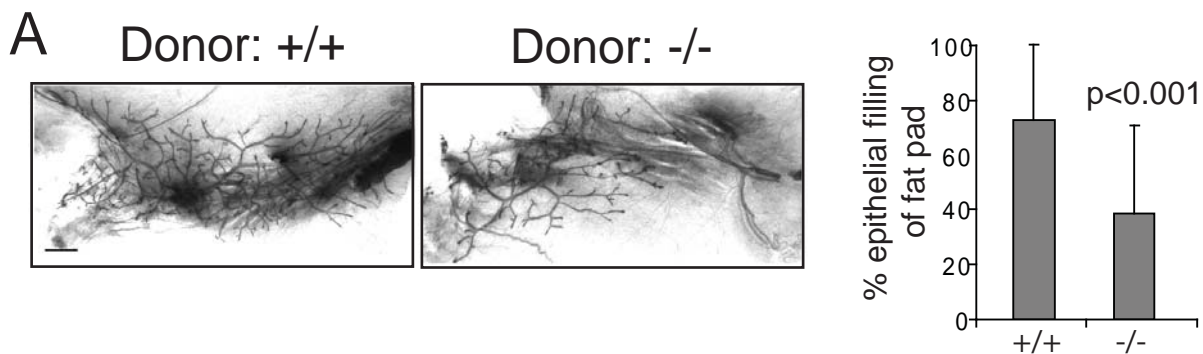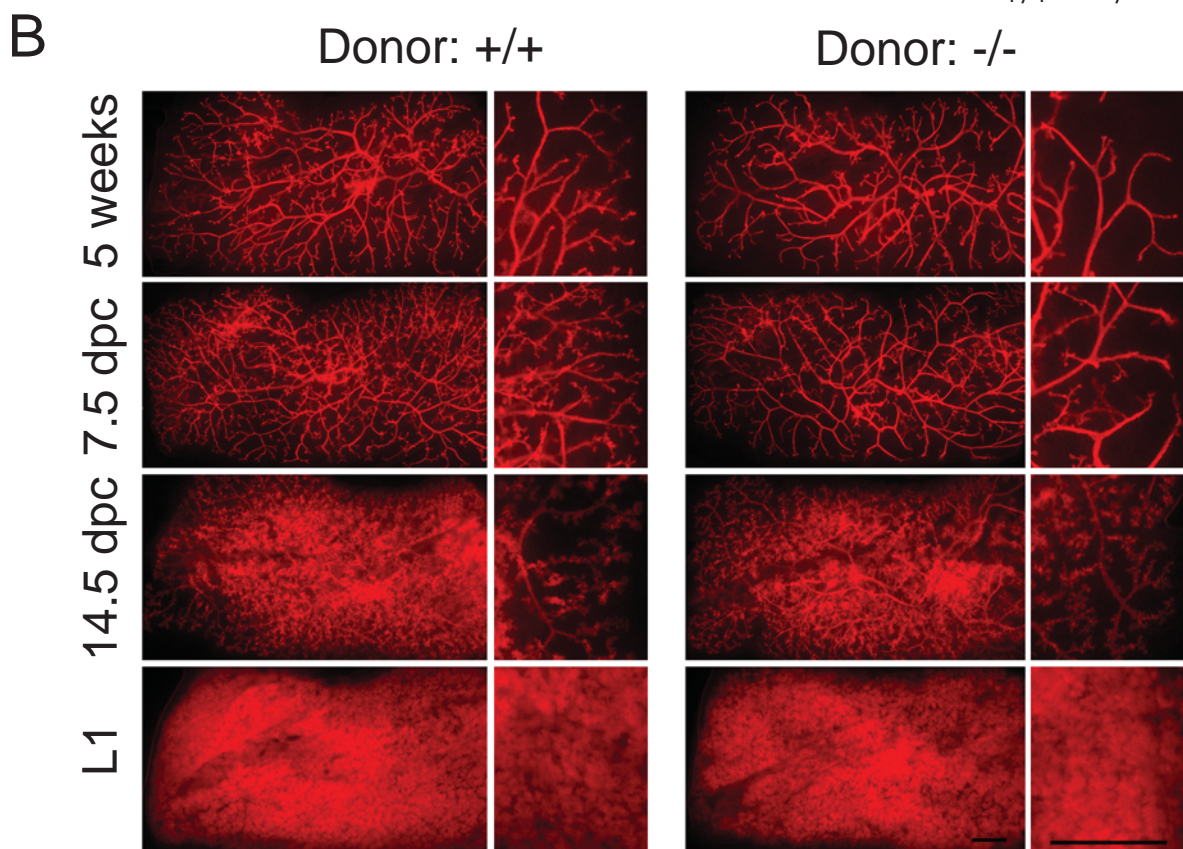

Supplement: supp_138.23.5247_DEV069203FigS4.pdf [file supp_138.23.5247_DEV069203FigS4.pdf]

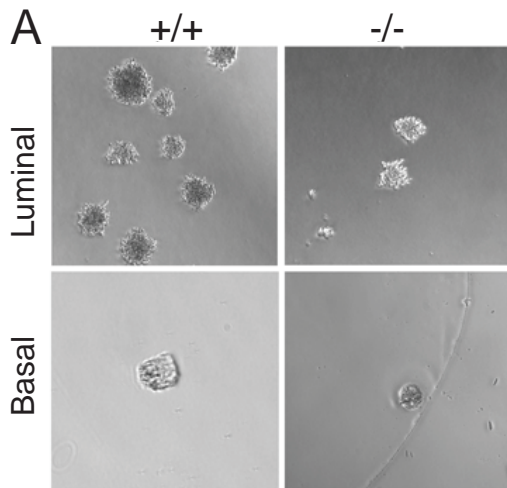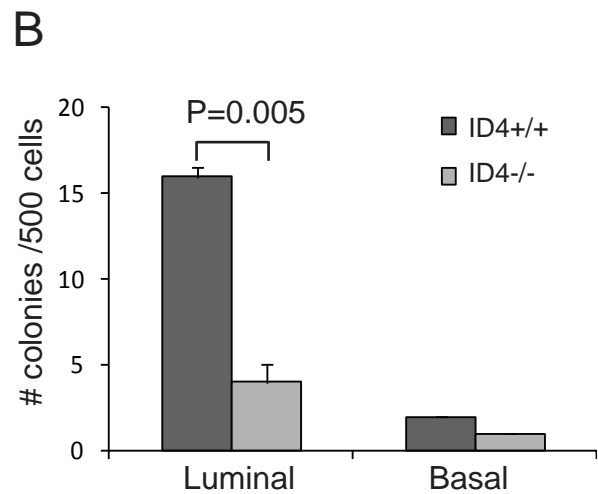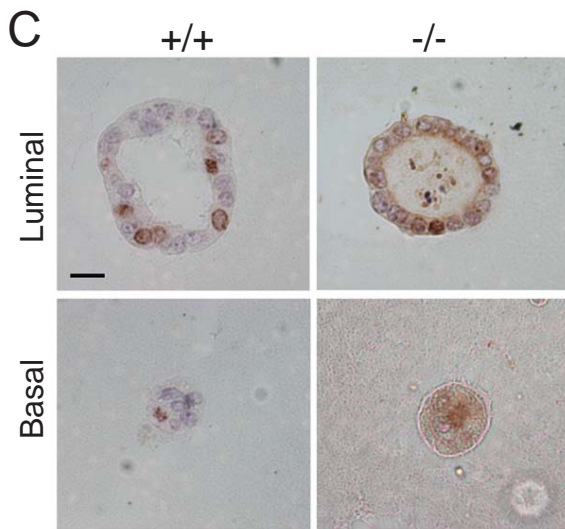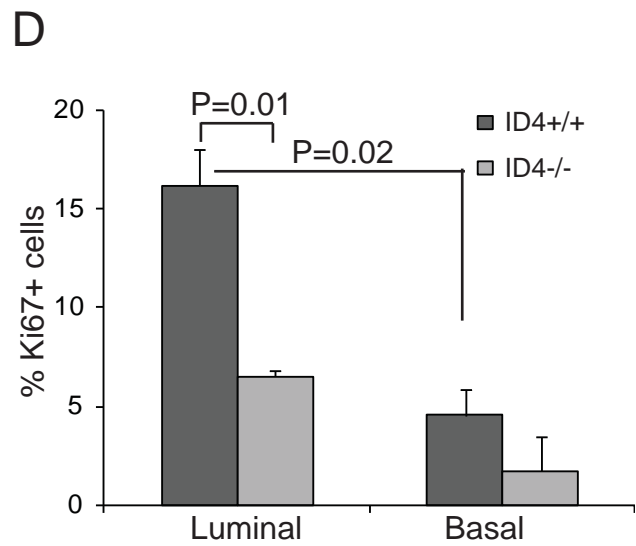

Supplement: supp_138.23.5247_DEV069203FigS5.pdf [file supp_138.23.5247_DEV069203FigS5.pdf]

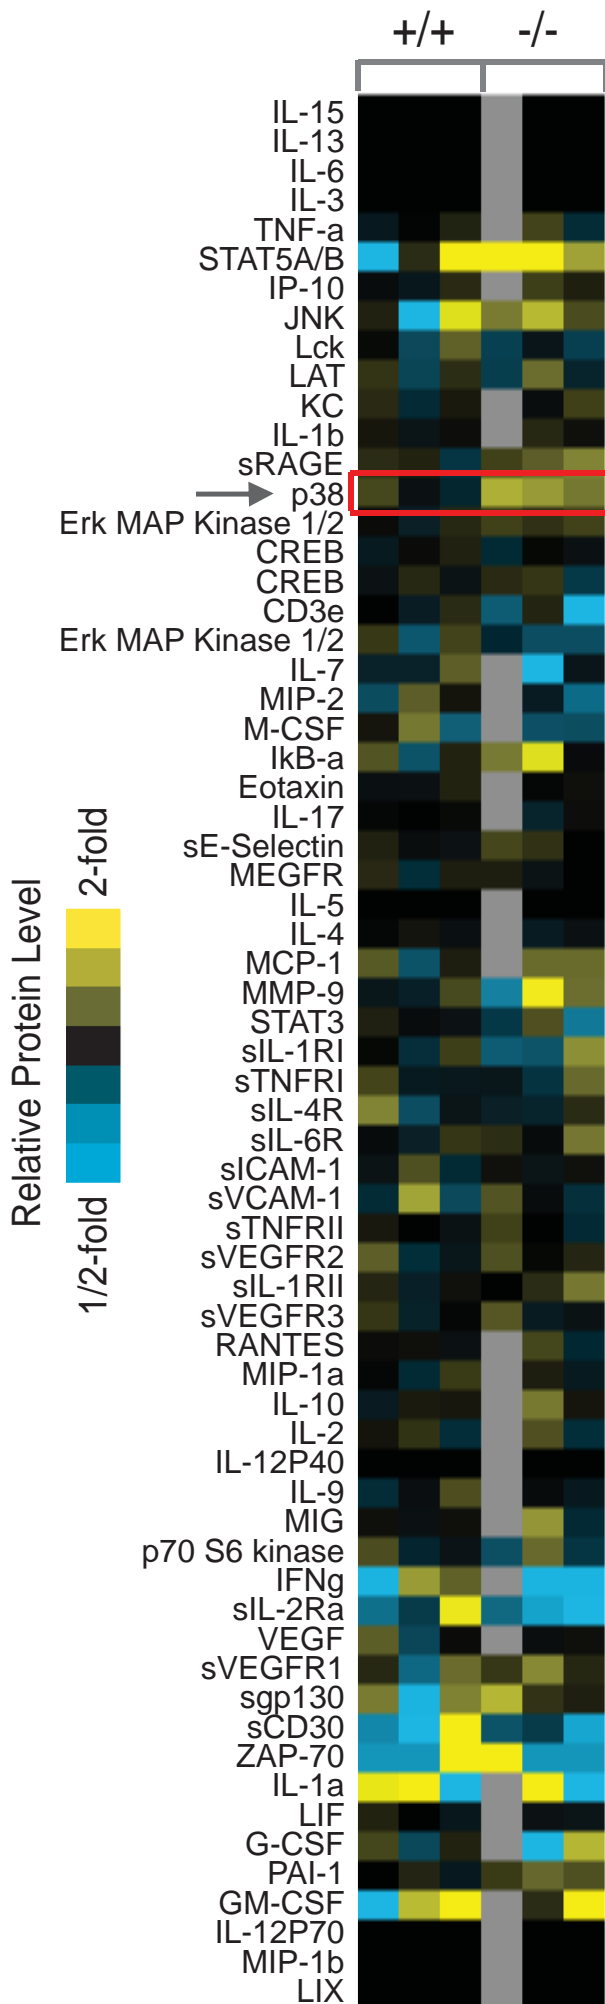

Supplement: supp_138.23.5247_DEV069203FigS6.pdf [file supp_138.23.5247_DEV069203FigS6.pdf]

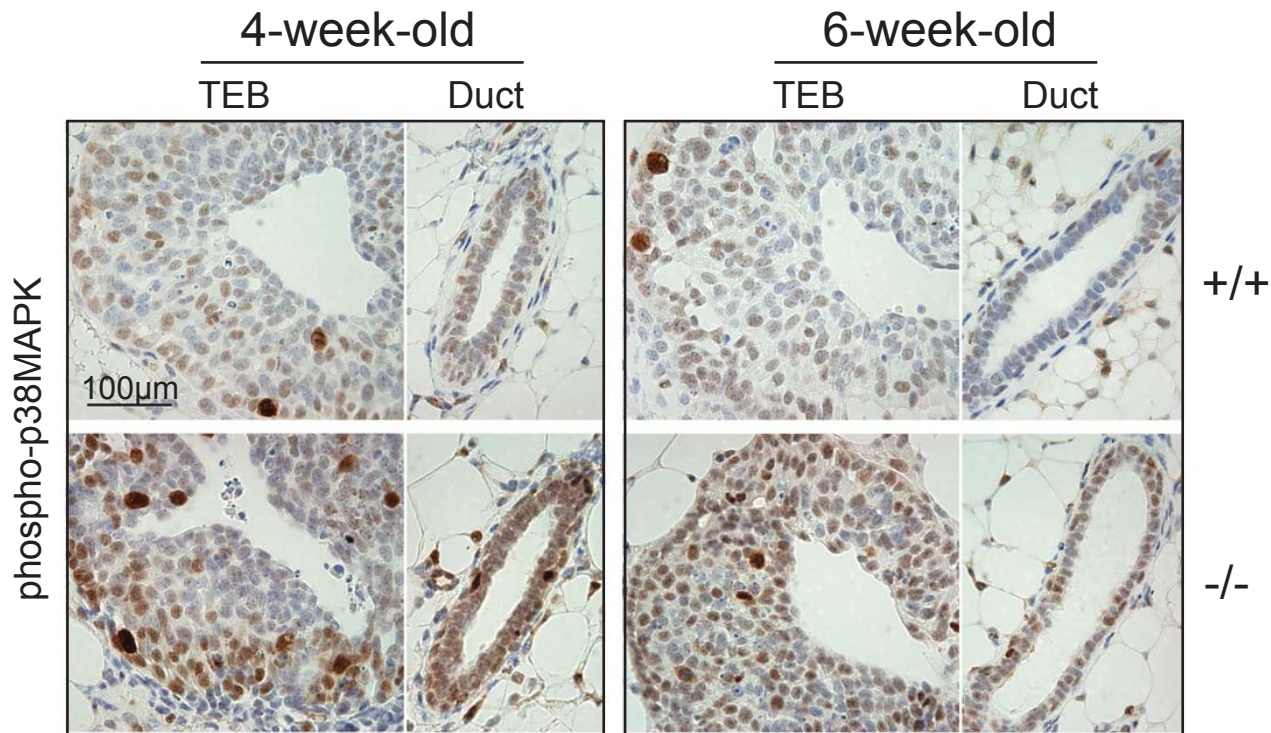

Supplement: supp_138.23.5247_DEV069203FigS7.pdf [file supp_138.23.5247_DEV069203FigS7.pdf]

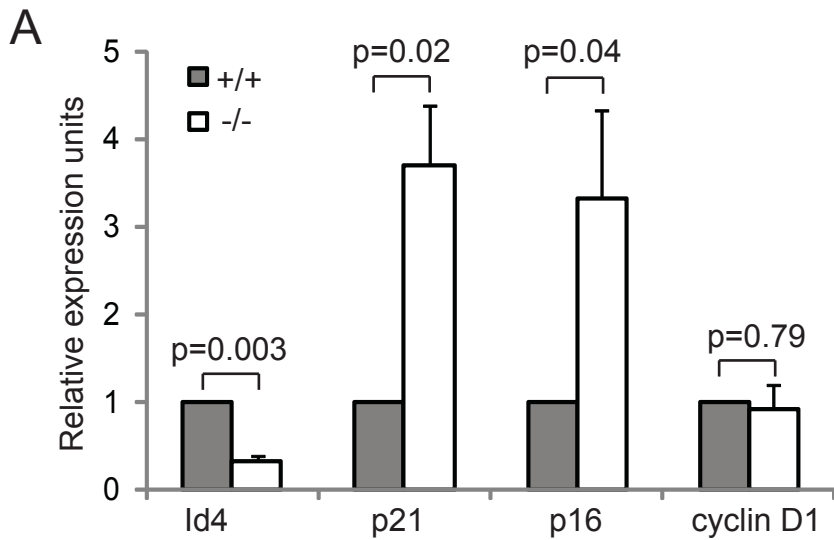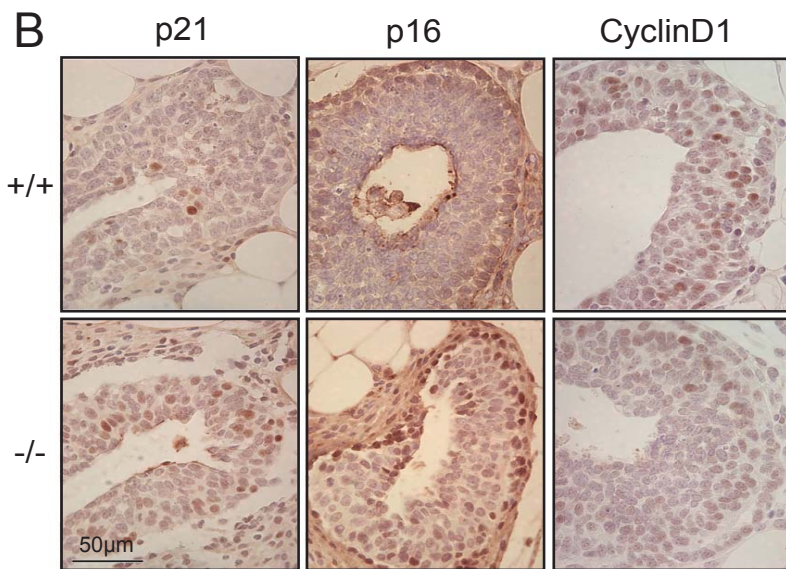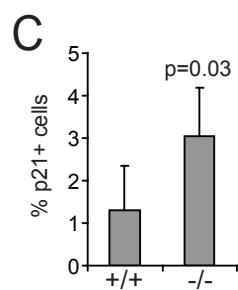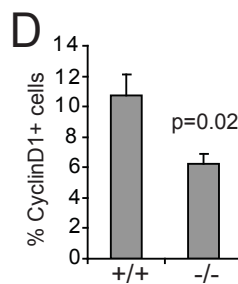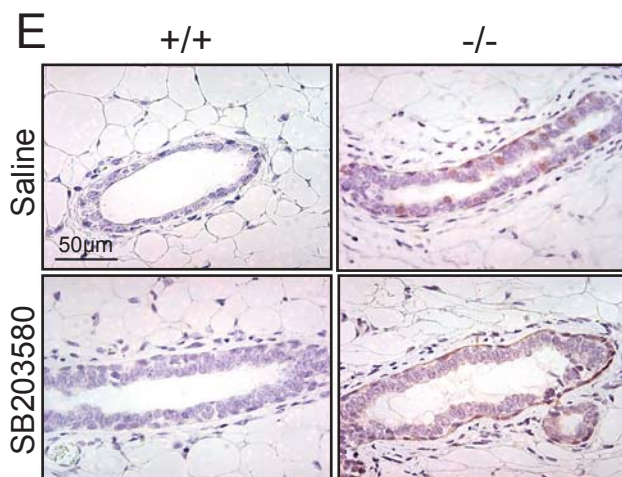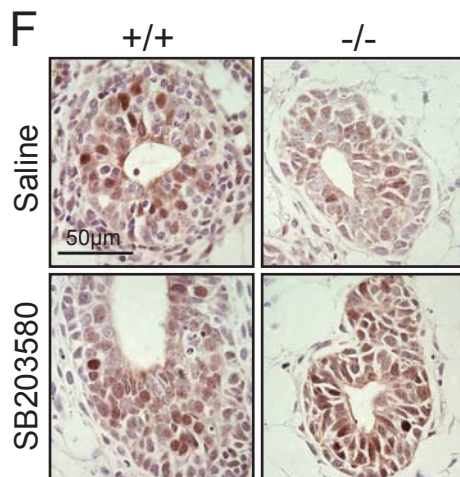

Supplement: supp_138.23.5247_DEV069203FigS8.pdf [file supp_138.23.5247_DEV069203FigS8.pdf]

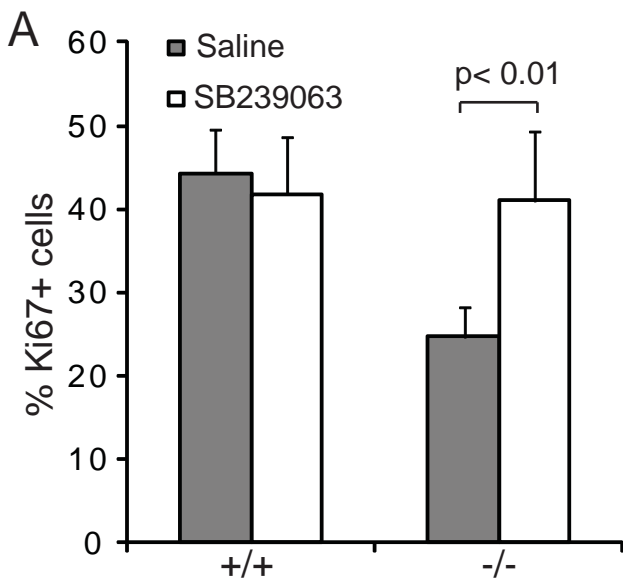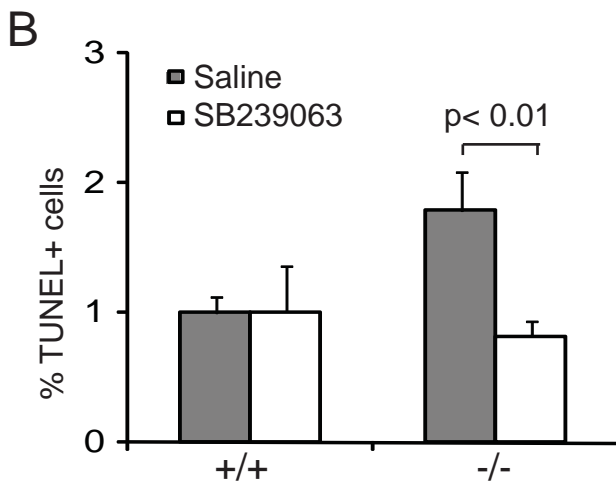

Supplement: supp_138.23.5247_DEV069203FigS9.pdf [file supp_138.23.5247_DEV069203FigS9.pdf]
